# Supplementary material for: Invariant water inclusion property of 1,3-alternate p-tert-butylthiacalix[4]arene tetra-methyleneoxycarboxylic acid
Source: Royal Society of Chemistry journal article supplement (doi:10.1039/c1ce05800b), 2011-12-12
Supplement: c1ce05800b.pdf [file c1ce05800b.pdf]

Supporting information of

**Invariant water inclusion property of 1,3-alternate *p-tert*-butylthiacalix[4]arene tetra-methyleneoxycarboxylic acid**

Yan Li, Weiping Yang, Rong Guo, Yuanyin Chen and Shuling Gong\*

*College of Chemistry and Molecular Sciences, Wuhan University, Wuhan 430072, PR China. Fax: +86 27 68754067; Tel: +86 27 68752701; E-mail: [gongsl@whu.edu.cn](mailto:gongsl@whu.edu.cn).*

Table S1: Dihedral angles of aromatic rings and reference molecular plane R (defined as the least squares plane containing the four sulfur atoms of the bridges) of compound **I** in solvate **1**, solvate **2** and complex **3**, and compound **II** in solvate **4**, solvate **5** and complex **6**;

Table S2: Dihedral angles of the apposite aromatic rings of compound **I** in solvate **1**, solvate **2** and complex **3**, and compound **II** in solvate **4**, solvate **5** and complex **6**;

Table S3: Torsion angles in the pendant arms of compound **I** in solvate **1**, solvate **2** and complex **3**;

Table S4: Torsion angles in the pendant arms of compound **II** in solvate **4**, solvate **5** and complex **6**;

Table S5: Hydrogen bonds of solvent **1**;

Table S6: Hydrogen bonds of complex **2**;

Table S7: Hydrogen bonds of solvent **3**;

Table S8: Hydrogen bonds of solvent **4**;

Table S9: Hydrogen bonds of complex **5**;

Table S10: Hydrogen bonds of complex **6**.

**Table S1.** Dihedral angles of aromatic rings and reference molecular plane R (defined as the least squares plane containing the four sulfur atoms of the bridges) of compound I in solvate 1, solvate 2 and complex 3, and compound II in solvate 4, solvate 5 and complex 6.

| Structure no. | Plane AR | Plane BR | Plane CR | Plane DR |
|---------------|----------|----------|----------|----------|
| 1             | 103.91   | 100.26   | 102.60   | 102.40   |
| 2             | 104.24   | 101.25   | 103.70   | 105.88   |
| 3             | 104.34   | 104.69   | 102.28   | 100.30   |
| 4             | 104.27   | 113.66   | 103.14   | 109.46   |
| 5             | 102.08   | 110.31   | 100.27   | 107.97   |
| 6             | 80.02    | 80.02    | 80.02    | 80.02    |

**Table S2.** Dihedral angles of the apposite aromatic rings of compound I in solvate 1, solvate 2 and complex 3, and compound II in solvate 4, solvate 5 and complex 6.

| Structure no. | Plane AC | Plane BD |
|---------------|----------|----------|
| 1             | 26.52    | 22.66    |
| 2             | 27.94    | 27.16    |
| 3             | 26.63    | 25.00    |
| 4             | 27.42    | 43.14    |
| 5             | 22.36    | 38.32    |
| 6             | 19.96    | 19.96    |

**Table S3.** Torsion angles in the pendant arms of compound **I** in solvate **1**, solvate **2** and complex **3**.

|         |                 | <b>1</b>  | <b>2</b>   | <b>3</b>  |
|---------|-----------------|-----------|------------|-----------|
| Chain A | C6-O1-C11-C12   | -175.6(3) | 175.8(8)   | 178.9(2)  |
|         | O1-C11-C12-O2   | -1.9(6)   | 6.0(16)    | 8.7(4)    |
|         | O1-C11-C12-O3   | 178.2(3)  | -174.4(9)  | -171.3(2) |
| Chain B | C14-O4-C23-C24  | -175.1(4) | -167.6(11) | 166.4(2)  |
|         | O4-C23-C24-O5   | -4.6(8)   | -8(2)      | 6.8(4)    |
|         | O4-C23-C24-O6   | 176.8(5)  | 175.2(16)  | -174.8(3) |
| Chain C | C30-O7-C35-C36  | -173.8(4) | -179.4(11) | -170.6(2) |
|         | O7-C35-C36-O9   | -7.4(6)   | -5(2)      | 0.6(4)    |
|         | O7-C35-C36-O8   | 174.2(4)  | 169.1(15)  | 179.3(3)  |
| Chain D | C38-O10-C47-C48 | -175.8(4) | -170.6(8)  | -175.7(3) |
|         | O10-C47-C48-O11 | -1.6(7)   | -2.6(18)   | -4.9(5)   |
|         | O10-C47-C48-O12 | 178.4(5)  | 179.0(10)  | 175.0(3)  |

**Table S4.** Torsion angles in the pendant arms of compound **II** in solvate **4**, solvate **5** and complex **6**.

|         |                 | <b>4</b>  | <b>5</b>    | <b>6</b>  |
|---------|-----------------|-----------|-------------|-----------|
| Chain A | C6-O1-C7-C8     | -138.1(2) | 139.35(19)  | -136.1(6) |
|         | O1-C7-C8-O2     | -6.3(4)   | 9.2(3)      | 9.4(8)    |
|         | O1-C7-C8-O3     | 176.0(2)  | -172.52(18) | -169.6(5) |
| Chain B | C10-O4-C15-C16  | 172.1(2)  | 177.71(19)  |           |
|         | O4-C15-C16-O5   | 6.8(4)    | 176.4(2)    |           |
|         | O4-C15-C16-O6   | -173.1(3) | -3.7(4)     |           |
| Chain C | C22-O7-C23-C24  | -168.7(3) | 174.2(2)    |           |
|         | O7-C23-C24-O9   | 20.8(4)   | -22.0(3)    |           |
|         | O7-C23-C24-O8   | -162.6(3) | 160.8(2)    |           |
| Chain D | C26-O10-C31-C32 | -75.8(4)  | -179.8(2)   |           |
|         | O10-C31-C32-O11 | -94.6(5)  | -178.3(3)   |           |
|         | O10-C31-C32-O12 | 83.0(4)   | 2.4(4)      |           |

**Table S5.** Hydrogen bonds of solvent 1 [Å and °].

| D-H...A                | d(D-H) | d(H...A) | d(D...A)  | <(DHA) |
|------------------------|--------|----------|-----------|--------|
| O(3)-H(3)...O(18)#1    | 0.84   | 1.73     | 2.547(5)  | 162.2  |
| O(15)-H(15)...O(8)#2   | 0.84   | 1.90     | 2.743(6)  | 176.1  |
| O(16)-H(16A)...O(12)#3 | 0.84   | 2.13     | 2.772(10) | 133.3  |
| O(16)-H(16A)...O(16)#3 | 0.84   | 1.94     | 2.531(19) | 126.1  |
| O(6)-H(6)...O(17)      | 0.84   | 1.78     | 2.565(6)  | 153.6  |
| O(11)-H(11)...O(14)    | 0.84   | 1.87     | 2.643(5)  | 152.2  |
| O(14)-H(14A)...O(5)    | 0.82   | 1.84     | 2.641(5)  | 166.7  |
| O(14)-H(14B)...O(4)    | 0.82   | 2.36     | 2.908(5)  | 124.7  |
| O(18)-H(18A)...O(15)   | 0.84   | 1.91     | 2.738(6)  | 166.2  |

Symmetry transformations used to generate equivalent atoms:

#1  $x, y+1, z$     #2  $x-1, y-1, z$     #3  $-x+2, -y+1, -z+1$

**Table S6.** Hydrogen bonds of solvent 2 [Å and °].

| D-H...A                | d(D-H)   | d(H...A) | d(D...A)  | <(DHA)  |
|------------------------|----------|----------|-----------|---------|
| O(5)-H(5)...O(14)#1    | 0.82(19) | 1.8(2)   | 2.450(17) | 139(19) |
| O(9)-H(9)...O(13)#1    | 0.82     | 1.91     | 2.569(12) | 136.4   |
| O(12)-H(12A)...O(15)#1 | 0.82     | 2.20     | 2.710(14) | 120.1   |
| O(3)-H(3)...O(16)      | 0.82     | 1.79     | 2.606(14) | 175.9   |
| O(13)-H(13B)...O(2)#2  | 0.82(16) | 2.3(3)   | 2.779(10) | 119(26) |
| O(14)-H(14A)...O(10)#2 | 0.84(10) | 2.3(2)   | 2.996(11) | 137(27) |
| O(14)-H(14A)...O(11)#2 | 0.84(10) | 2.1(2)   | 2.783(13) | 135(1)  |

Symmetry transformations used to generate equivalent atoms:

#1  $xy, z+1$     #2  $xy, z-1$

**Table S7.** Hydrogen bonds of complex **3** [Å and °].

| D-H...A              | d(D-H) | d(H...A) | d(D...A) | <(DHA) |
|----------------------|--------|----------|----------|--------|
| O(14)-H(14D)...O(4)  | 0.85   | 2.13     | 2.978(2) | 179.8  |
| O(14)-H(14C)...O(11) | 0.85   | 2.55     | 2.961(3) | 110.8  |
| O(14)-H(14C)...O(10) | 0.85   | 2.14     | 2.986(3) | 179.5  |
| O(13)-H(13D)...O(7)  | 0.85   | 1.91     | 2.761(2) | 179.4  |
| O(13)-H(13C)...O(1)  | 0.85   | 2.17     | 3.017(2) | 179.5  |
| O(12)-H(12)...N(1)   | 0.82   | 1.85     | 2.655(3) | 165.8  |
| O(9)-H(9)...O(13)    | 0.85   | 1.72     | 2.568(3) | 179.8  |
| O(5)-H(5A)...O(14)   | 0.85   | 1.77     | 2.620(3) | 179.8  |

Symmetry transformations used to generate equivalent atoms:

#1 -x,-y+1,-z+1

**Table S8.** Hydrogen bonds of solvent **4** [Å and °].

| D-H...A               | d(D-H)    | d(H...A)  | d(D...A) | <(DHA) |
|-----------------------|-----------|-----------|----------|--------|
| O(3)-H(3)...O(2)#1    | 0.82      | 1.84      | 2.658(3) | 176.3  |
| O(12)-H(12)...O(14)#2 | 0.82      | 1.90      | 2.711(4) | 169.9  |
| O(9)-H(9)...O(13)#3   | 0.82      | 1.72      | 2.536(3) | 170.9  |
| O(5)-H(5A)...O(4)     | 0.82      | 2.04      | 2.565(3) | 121.6  |
| O(13)-H(13B)...O(7)   | 0.818(10) | 2.239(13) | 3.047(3) | 170(4) |
| O(13)-H(13B)...O(9)   | 0.818(10) | 2.39(3)   | 2.881(3) | 119(3) |
| O(13)-H(13A)...O(1)   | 0.815(10) | 2.13(2)   | 2.883(3) | 154(4) |
| O(13)-H(13A)...O(2)   | 0.815(10) | 2.65(4)   | 3.129(3) | 119(3) |
| O(14)-H(14)...O(8)#4  | 0.82      | 1.90      | 2.706(3) | 167.1  |

Symmetry transformations used to generate equivalent atoms:

#1 -x,-y+1,-z    #2 x1,y-1,z    #3 -x+1,-y+1,-z  
#4 -x+2,-y+1,-z

**Table S9.** Hydrogen bonds of solvent **5** [Å and °].

| D-H...A              | d(D-H)  | d(H...A) | d(D...A) | <(DHA) |
|----------------------|---------|----------|----------|--------|
| O(9)-H(9A)...O(13)#1 | 0.82    | 1.75     | 2.554(3) | 165.3  |
| O(5)-H(5)...O(6)#2   | 0.82    | 1.86     | 2.680(2) | 175.6  |
| O(3)-H(3)...O(2)#3   | 0.82    | 1.83     | 2.651(2) | 173.9  |
| O(12)-H(12)...O(10)  | 0.82    | 2.09     | 2.605(2) | 120.5  |
| O(13)-H(13B)...O(2)  | 0.72(3) | 2.63(3)  | 3.035(3) | 118(3) |
| O(13)-H(13B)...O(1)  | 0.72(3) | 2.21(3)  | 2.891(3) | 157(3) |
| O(13)-H(13A)...O(9)  | 0.82(4) | 2.34(4)  | 2.874(3) | 124(3) |
| O(13)-H(13A)...O(7)  | 0.82(4) | 2.24(4)  | 3.036(3) | 166(3) |

Symmetry transformations used to generate equivalent atoms:

#1 -x+1,-y+1,-z+1    #2 -x+1,-y+1,-z    #3 -x+1,-y+2,-z+1

**Table S10.** Hydrogen bonds of complex **6** [Å and °].

| D-H...A           | d(D-H)  | d(H...A) | d(D...A) | <(DHA)  |
|-------------------|---------|----------|----------|---------|
| O(4)-H(4B)...O(2) | 0.82(2) | 2.45(6)  | 2.89(5)  | 114.(4) |
